# Supplementary material for: Community-Acquired, Bacteraemic Acinetobacter Baumannii Pneumonia: A Retrospective Review of Cases in Tropical Queensland, Australia
Source: MDPI journal article supplement (doi:10.3390/tropicalmed8080419), 2023-08-18
Supplement: s1 [file s1]

Table S1: Antibiotic sensitivity profile of isolates

| <i>Isolate</i> | GEN | MER | CIP | FEP | TAZ/TIM | CAZ | SXT | CRO |
|----------------|-----|-----|-----|-----|---------|-----|-----|-----|
| 1              | S   | S   | S   | S   | S       | S   | S   | S   |
| 2              | S   | S   | S   | S   | S       | S   | R   | R   |
| 3              | S   | S   | R   | S   | S       | S   | S   | R   |
| 4              | S   | S   | S   | S   | S       | S   | R   | R   |
| 5              | S   | S   | S   | S   | S       | S   | S   | S   |
| 6              | S   | S   | S   | S   | S       | S   | S   | R   |
| 7              | S   | S   | S   | S   | S       | S   | R   | R   |
| 8              | S   | S   | S   | S   | S       | S   | S   | R   |
| 9              | S   | S   | S   | S   | S       | S   | S   | S   |
| 10             | S   | S   | S   | N/A | S       | S   | S   | S   |
| 11             | S   | S   | S   | S   | S       | S   | R   | R   |
| 12             | S   | S   | S   | S   | S       | S   | S   | R   |
| 13             | S   | S   | S   | S   | S       | S   | S   | R   |
| 14             | S   | S   | S   | S   | S       | S   | S   | R   |
| 15             | S   | S   | S   | S   | S       | S   | R   | S   |
| 16             | S   | S   | S   | S   | S       | S   | S   | R   |
| 17             | S   | S   | S   | S   | S       | S   | S   | R   |
| 18             | S   | S   | S   | S   | S       | S   | S   | N/A |
| 19             | S   | S   | S   | S   | S       | S   | R   | R   |
| 20             | S   | S   | S   | S   | S       | S   | S   | R   |
| 21             | S   | S   | S   | S   | S       | S   | R   | R   |
| 22             | S   | S   | S   | S   | S       | S   | R   | R   |
| 23             | S   | S   | S   | S   | S       | S   | S   | R   |
| 24             | S   | S   | S   | S   | S       | S   | S   | R   |
| 25             | S   | S   | S   | S   | S       | S   | S   | R   |
| 26             | S   | S   | S   | S   | S       | S   | S   | R   |
| 27             | S   | S   | S   | S   | S       | S   | S   | R   |
| 28             | S   | S   | S   | S   | R       | R   | S   | R   |

GEN = Gentamicin, MER = Meropenem, CIP = Ciprofloxacin, FEP = Cefepime, TAZ = Piperacillin-Tazobactam, TIM = Ticarcillin/Clavulanate, CAZ = Ceftazidime, SXT = Sulfamethoxazole-Trimethoprim, CRO = Ceftriaxone, N/A = Not Available.
